# Supplementary material for: Inducing multiple nicks promotes interhomolog homologous recombination to correct heterozygous mutations in somatic cells
Source: PubMed Central journal article supplement (PMC10504326; doi:10.1038/s41467-023-41048-5), 2023-09-15
Supplement: 41467_2023_41048_MOESM3_ESM.pdf [file 41467_2023_41048_MOESM3_ESM.pdf]

Title: Supplementary Data 1:

Description: List of guide RNAs

Title: Supplementary Data 2:

Description: List of predicted off-targets  
(sgEx4\_mt20s)

Title: Supplementary Data 3:

Description: List of predicted off-targets (sgS8)

Title: Supplementary Data 4:

Description: List of predicted off-targets (sgS14)

Title: Supplementary Data 5:

Description: List of predicted off-targets (sgS34)

Title: Supplementary Data 6:

Description: List of cell lines and culture media

Title: Supplementary Data 7:

Description: List of oligonucleotides

Title: Supplementary Data 8:

Description: List of antibodies

Title: Supplementary Data 9:

Description: List of amplicon-based NGS BAM files

Title: Supplementary Data 10:

Description: List of WGS data
